# Supplementary material
Source: PubMed Central journal article supplement (PMC3437625)

## Supplemental Data

Conformational Heterogeneity of Karyopherin $\beta$ 2

## Is Segmental

Ahmet E. Cansizoglu and Yuh Min Chook

**Table S1.** Summary of Refinement Using NCS to Constrain Kap $\beta$ 2 Chains A to D and Chains B to C

| <i>Refinement #</i> | <i>Number of NCS Groups</i> | <i>NCS Groups</i>                                                | <i>NCS Restraints</i>                                    | <i>R<sub>free</sub> (%)</i> | <i>R<sub>factor</sub> (%)</i> |
|---------------------|-----------------------------|------------------------------------------------------------------|----------------------------------------------------------|-----------------------------|-------------------------------|
| 1                   | 0                           | None                                                             | None                                                     | 28.4                        | 24.6                          |
| 2                   | 2                           | A,D*(H1-20) <sup>§</sup><br>B,C*(H1-20)                          | Tight<br>Tight                                           | 31.4                        | 29.1                          |
| 3                   | 8                           | A,D(H1-4,H5-12,H14-17, H19-20)<br>B,C(H1-4,H5-12,H14-17, H19-20) | Tight, Tight, Tight, Tight<br>Tight, Tight, Tight, Tight | 28.4                        | 25.9                          |
| 4                   | 6                           | A,D(H1-12,H14-17, H19-20)<br>B,C(H1-12,H14-17, H19-20)           | Tight, Tight, Tight<br>Tight, Tight, Tight               | 29.2                        | 26.5                          |
| 5                   | 6                           | A,D(H1-4,H5-17, H19-20)<br>B,C(H1-4,H5-17, H19-20)               | Tight, Tight, Tight<br>Tight, Tight, Tight               | 29.1                        | 26.8                          |
| 6                   | 6                           | A,D(H1-4,H5-12,H14-20)<br>B,C(H1-4,H5-12,H14-20)                 | Tight, Tight, Tight<br>Tight, Tight, Tight               | 28.6 <sup>†</sup>           | 26.1 <sup>†</sup>             |

<sup>‡</sup> G.N. Murshudov, A.A.Vagin and E.J.Dodson, Refinement of Macromolecular Structures by the Maximum-Likelihood Method. (1997) Acta Cryst. **D53**, 240-255.

\* A, D indicates that Kap $\beta$ 2 chains A and D are constrained by NCS; B, C denotes Kap $\beta$ 2 chains B and C are constrained by NCS.

<sup>§</sup> (H1-20) denotes Kap $\beta$ 2 HEAT repeats 1 through 20.

<sup>†</sup> Reported in Table 1.

**Table S2.** Summary of Refinement Using NCS to Constrain Kap $\beta$ 2 Chains A, B, C, and D

| <i>Refinement #</i> | <i>Number of NCS Groups</i> | <i>NCS Groups</i>              | <i>NCS Restraints</i>        | <i>R<sub>free</sub> (%)</i> | <i>R<sub>factor</sub> (%)</i> |
|---------------------|-----------------------------|--------------------------------|------------------------------|-----------------------------|-------------------------------|
| 7                   | 1                           | A-D*(H1-20) <sup>§</sup>       | Tight                        | 42.6                        | 40.5                          |
| 8                   | 4                           | A-D(H1-4,H5-12,H14-17, H19-20) | Tight, Tight, Tight, Tight   | 32.3                        | 30.4                          |
| 9                   | 4                           | A-D(H1-4,H5-12,H14-17, H19-20) | Medium, Tight, Tight, Tight  | 32.4                        | 30.0                          |
| 10                  | 4                           | A-D(H1-4,H5-12,H14-17, H19-20) | Tight, Medium, Tight, Tight  | 30.6                        | 27.8                          |
| 11                  | 4                           | A-D(H1-4,H5-12,H14-17, H19-20) | Tight, Tight, Medium, Tight  | 32.8                        | 30.0                          |
| 12                  | 4                           | A-D(H1-4,H5-12,H14-17, H19-20) | Tight, Tight, Tight, Medium  | 30.7                        | 28.8                          |
| 13                  | 4                           | A-D(H1-4,H5-12,H14-17, H19-20) | Tight, Medium, Tight, Medium | 28.7                        | 26.0                          |
| 14                  | 4                           | A-D(H1-4,H5-12,H14-17, H19-20) | Tight, Loose, Tight, Medium  | 28.5                        | 25.7                          |
| 15                  | 4                           | A-D(H1-4,H5-12,H14-17, H19-20) | Tight, Medium, Tight, Loose  | 28.5                        | 25.9                          |
| 16                  | 4                           | A-D(H1-4,H5-12,H14-17, H19-20) | Tight, Loose, Tight, Loose   | 28.3                        | 25.6                          |

<sup>‡</sup> G.N. Murshudov, A.A.Vagin and E.J.Dodson, Refinement of Macromolecular Structures by the

\* A-D indicates that Kap $\beta$ 2 chains A, B, C and D are all subjected to NCS restraints.

<sup>§</sup> (H1-20) represents HEAT repeats 1 through 20.

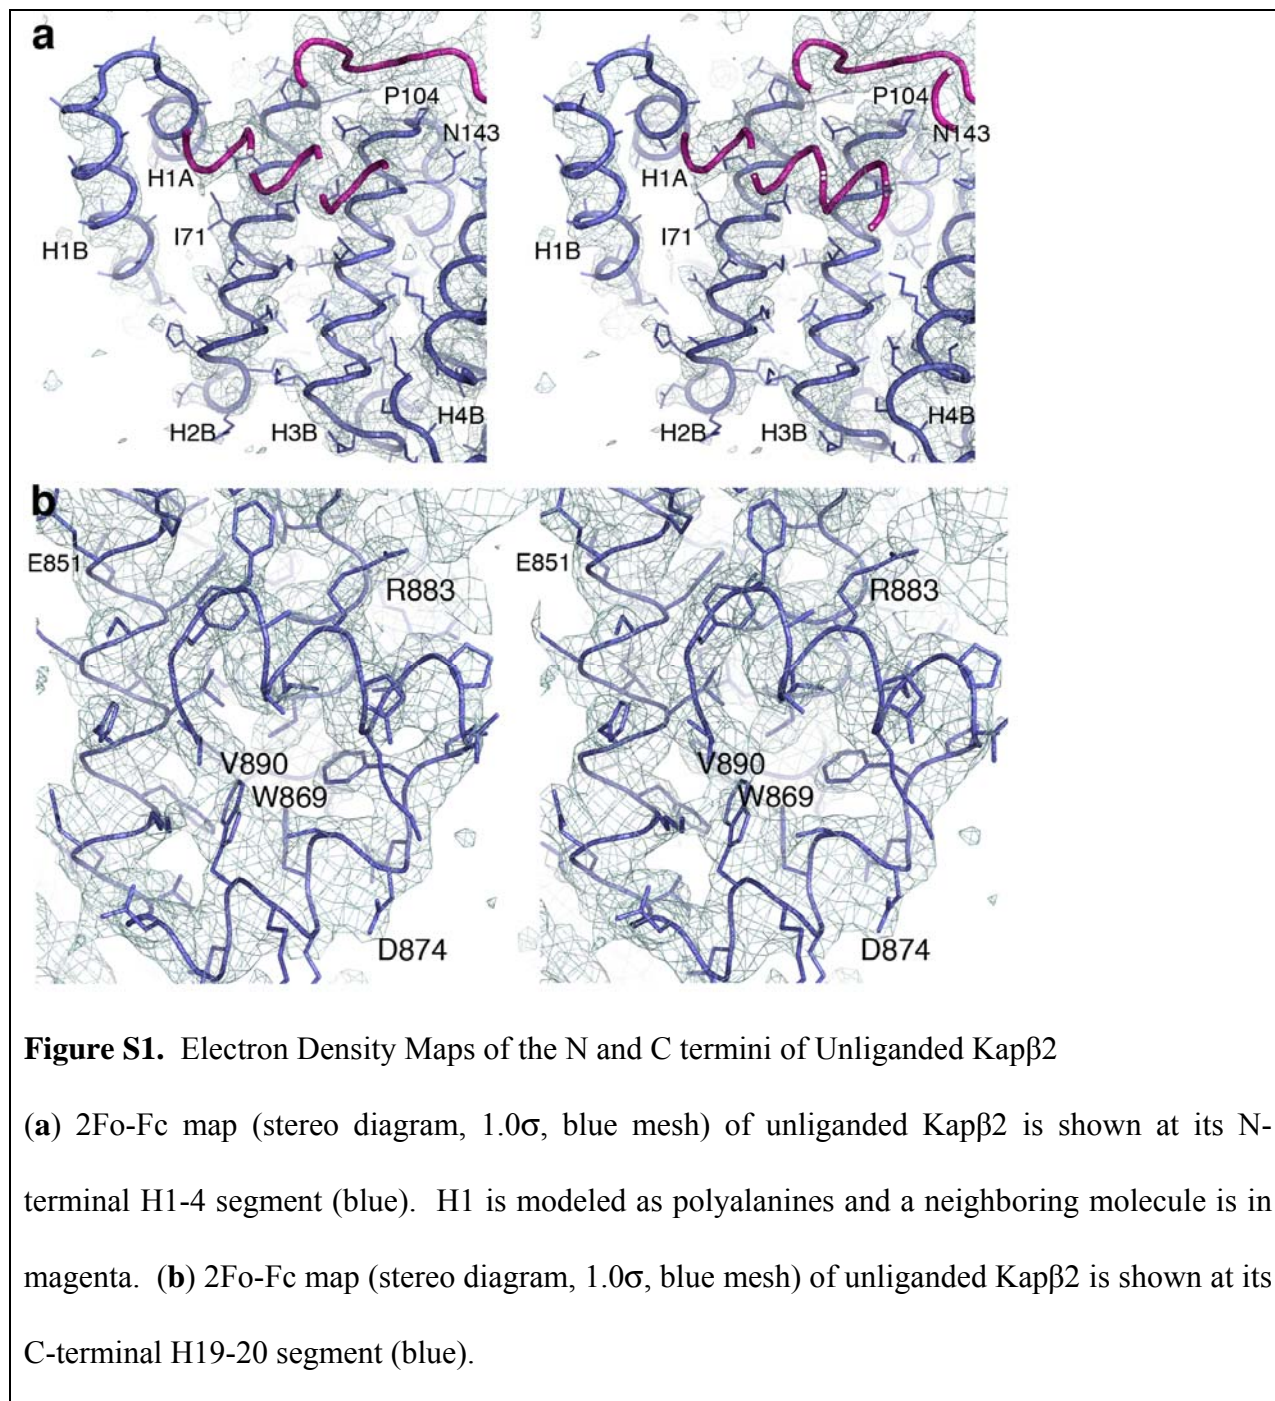

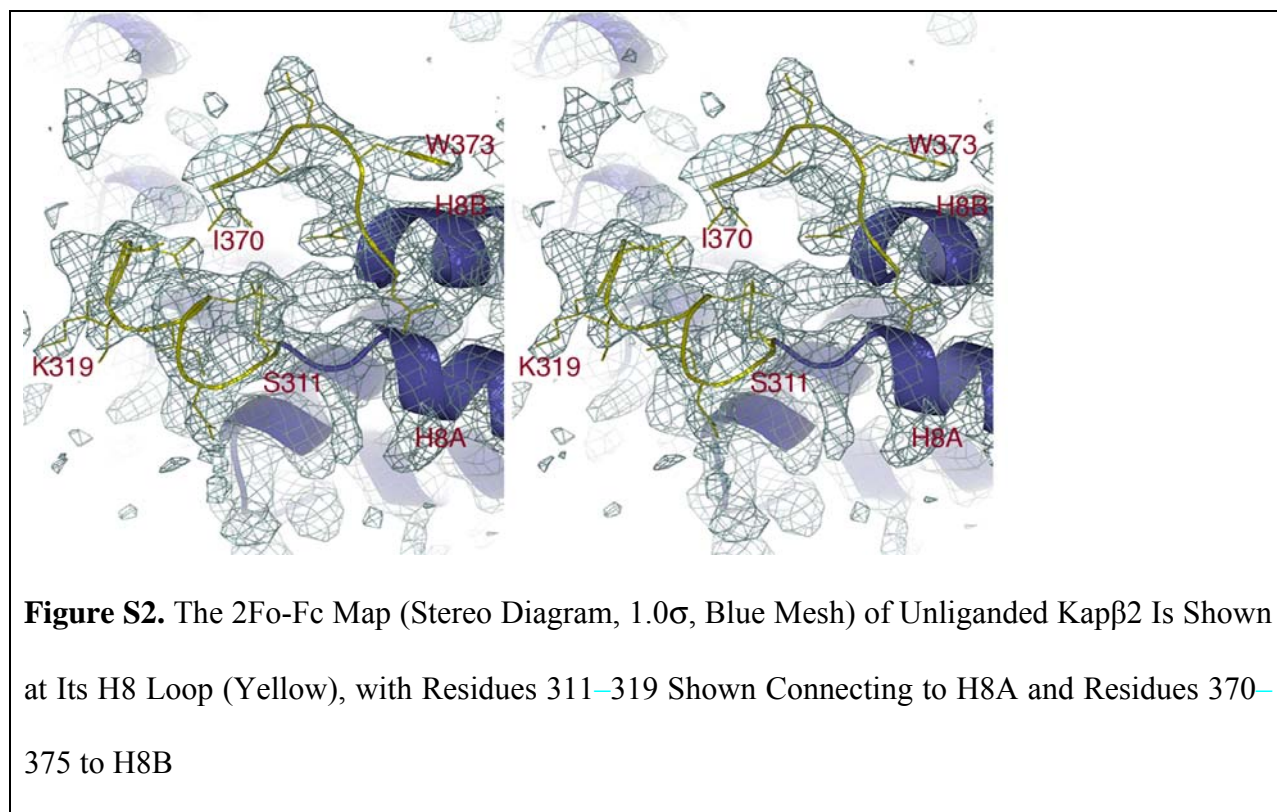

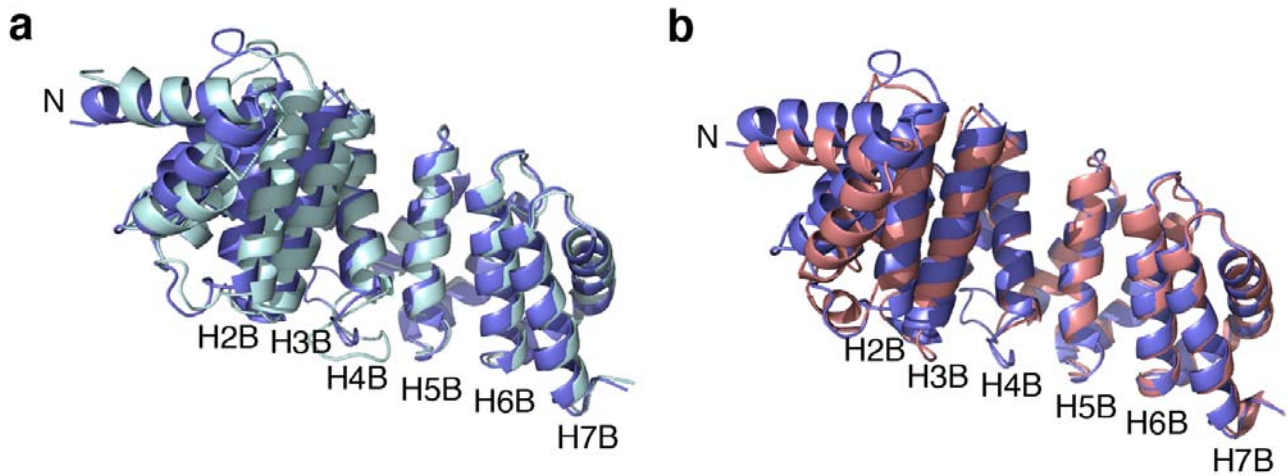

**Figure S3.** Conformational Flexibility at the N-Terminal H1-H4 Segment of Kap $\beta$ 2

(a) Ribbon diagram showing H1-H7 of chains A (blue) and C (light blue) of unliganded Kap $\beta$ 2, superimposed at H5-H13. (b) same as (a), except chain A of unliganded Kap $\beta$ 2 is superimposed with substrate-bound Kap $\beta$ 2 (pink).



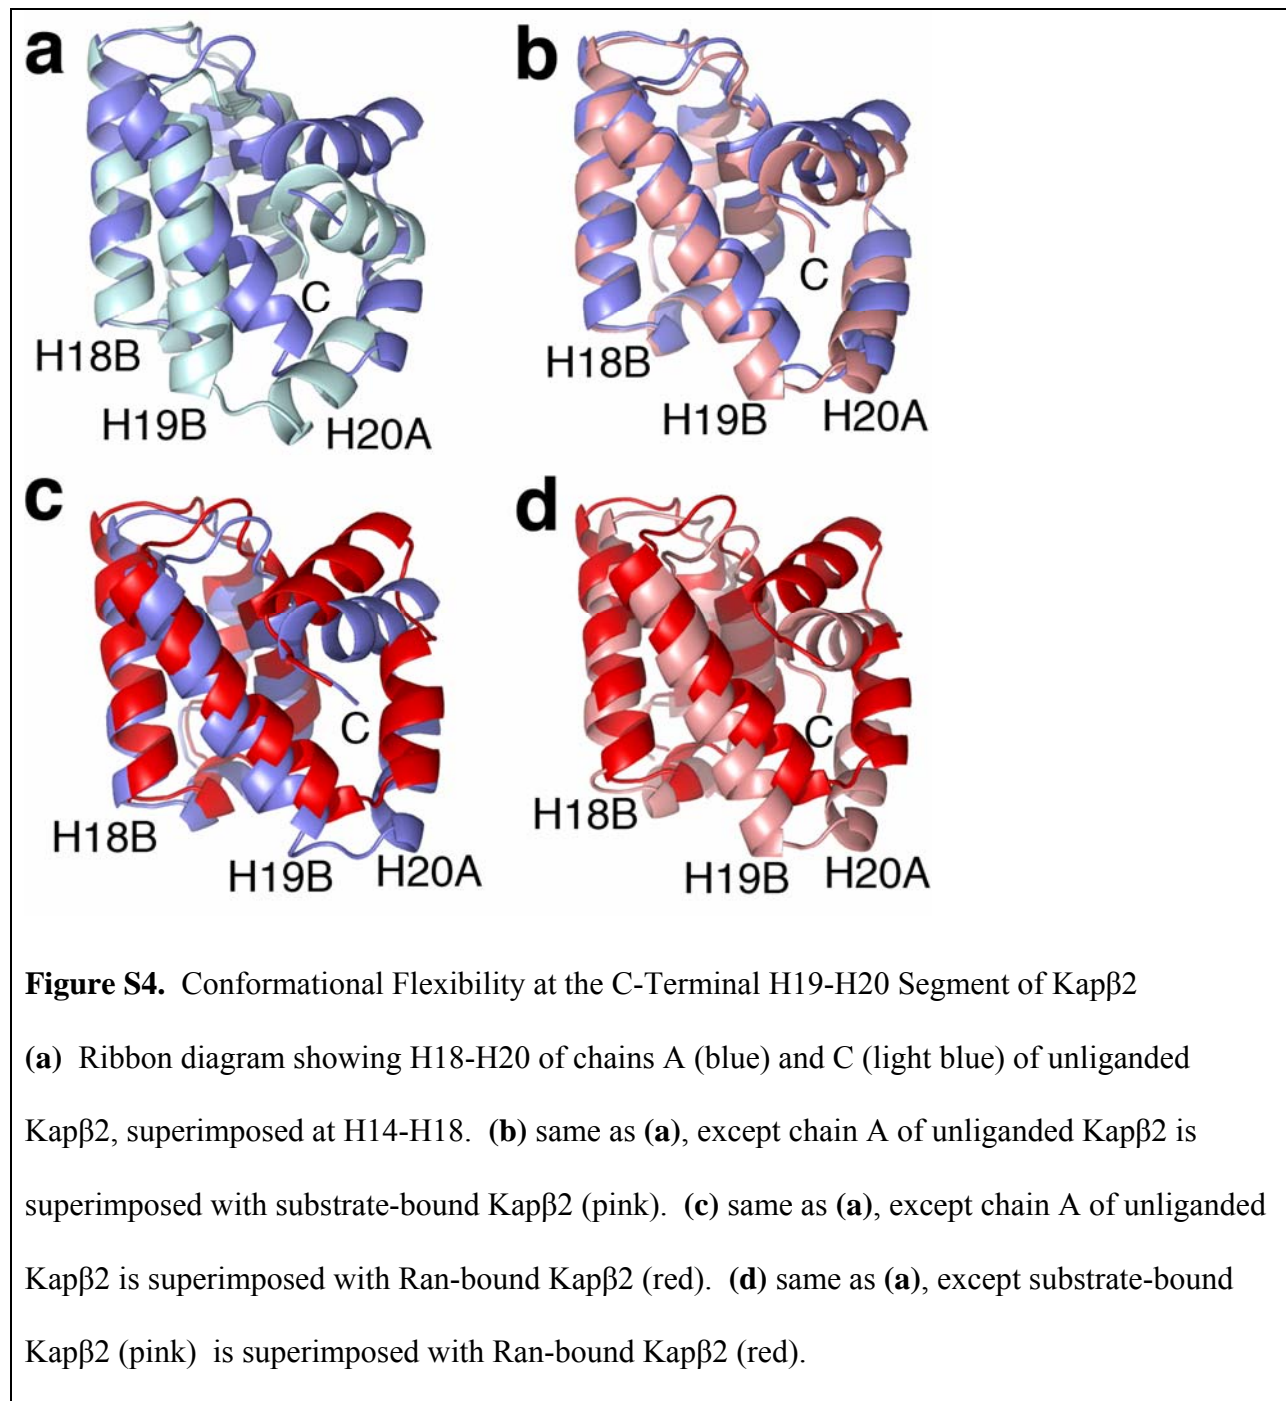

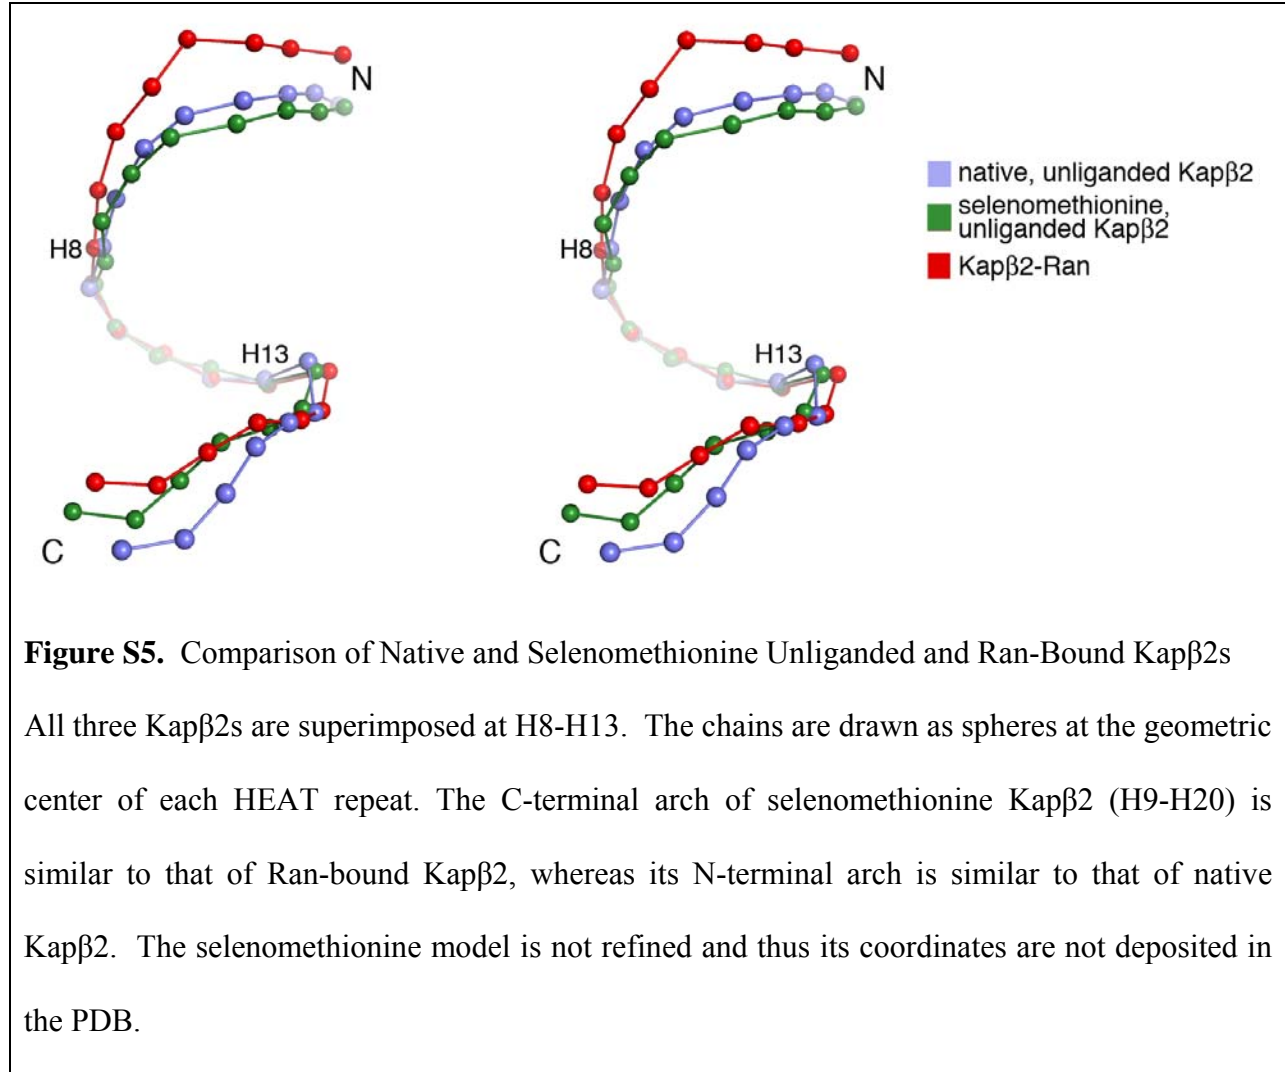

Supplement: NIHMS403858-supplement-Supplementary_Data.pdf [file NIHMS403858-supplement-Supplementary_Data.pdf]
